# Supplementary material for: Comparison among three variant callers and assessment of the accuracy of imputation from SNP array data to whole-genome sequence level in chicken
Source: PubMed Central journal article supplement (PMC4618161; doi:10.1186/s12864-015-2059-2), 2015-10-21
Supplement: 12864_2015_2059_MOESM2_ESM.pdf [file 12864_2015_2059_MOESM2_ESM.pdf]

# Pipeline of strategy for genotype quality enhancement

VCF files

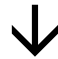

Genotype likelihood files with GATK

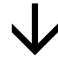

Phasing with Beagle 3

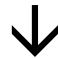

Output: New Genotype likelihood files

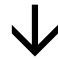

VCF files with GATK, in which the genotype quality is enhanced
