# Supplementary material for: Comparison among three variant callers and assessment of the accuracy of imputation from SNP array data to whole-genome sequence level in chicken
Source: PubMed Central journal article supplement (PMC4618161; doi:10.1186/s12864-015-2059-2), 2015-10-21
Supplement: 12864_2015_2059_MOESM7_ESM.pdf [file 12864_2015_2059_MOESM7_ESM.pdf]

Pipeline

Raw reads

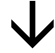

Alignment: reference Galgal4; BWA

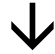

Remove duplication: picard-tools

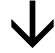

Call variants : GATK/freebayes/SAMtools

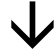

Select SNP: GATK

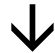

Hard filtering : DP & mapping quality

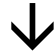

Separate brown and white layers: GATK

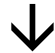

Exclude monomorphic SNPs

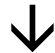

Improve the quality of genotype : Beagle

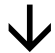

Imputation: minimac/FImpute/IMPUTE2
