# Supplementary material for: Comparison among three variant callers and assessment of the accuracy of imputation from SNP array data to whole-genome sequence level in chicken
Source: BMC Genomics. 2015 Oct 21;16:824. doi: 10.1186/s12864-015-2059-2 (PMC4618161; doi:10.1186/s12864-015-2059-2)
Supplement: Additional file 5: — Number of variants identified by GATK, SAMtools and freebayes in the layer chicken genome. (XLSX 13 kb) [file 12864_2015_2059_MOESM5_ESM.xlsx]

## Sheet: Sheet1
	variant (SNP and Indels)				SNP				SNP after hard filter				nonmonomorphic SNP in brown layer after hard filter		nonmonomorphic SNP in white layer after hard filter		nonmonomorphic SNP in brown layer after hard filter and beagle improve
chromosome	GATK	samtools	freebayes		GATK	samtools	freebayes		GATK	samtools	freebayes		GATK		GATK		GATK
chr1	2986115	2757519	2689739		2675300	2339414	2193172		2614512	2263806	2148508		2140399		1865455		1785834
chr2	2230952	2062027	2002074		1995298	1742818	1628952		1957964	1693768	1603019		1567771		1406351		1289474
chr3	1617688	1490861	1450265		1443663	1254959	1179864		1423794	1230519	1167880		1164789		1012073		952826
chr4	1424172	1314443	1268210		1267845	1104782	1026046		1245580	1075285	1012059		995317		926557		812068
chr5	898059	836593	804779		800896	708189	652922		789057	689258	645390		651694		548664		547630
chr6	609805	569183	541646		547985	488182	441207		539252	477105	435607		440647		391738		365802
chr7	572488	532966	511215		511842	452320	416848		506300	444716	413793		404370		364597		333490
chr8	408143	377794	367645		365601	319570	300822		360305	313487	297678		305458		255195		255022
chr9	384511	359041	344162		346044	307267	282414		340769	301176	279278		278368		237206		224490
chr10	292851	271961	263775		263383	231332	216442		258481	225009	212929		208009		190814		159675
chr11	266883	246170	240247		237523	206505	195656		232785	199750	192010		185860		167697		148566
chr12	313943	293547	283037		282862	252376	232598		276938	245252	228624		224357		201102		186263
chr13	269628	254209	245097		243867	220637	202230		238082	212037	197967		187559		171448		147915
chr14	233262	219138	211064		210545	189140	173572		205576	182709	169920		168029		149935		140252
chr15	164806	154805	151739		148896	133681	125517		146614	130735	123990		120098		101375		100750
chr16	18641	17983	17011		17371	16703	12590		9782	6903	6593		7823		6494		7434
chr17	156344	147999	143942		141893	128718	119501		138181	123692	116575		113031		97729		95217
chr18	154045	149883	142095		140306	131468	118099		137942	124910	116592		112690		95772		90222
chr19	138734	132232	128557		126278	116114	107044		123715	112233	105056		102712		78932		87608
chr20	196396	186265	179880		178389	162001	149303		174293	156175	146898		143672		109875		117100
chr21	101241	95420	92889		91822	82968	76892		89491	80156	75324		69199		63899		54375
chr22	36140	33093	34301		32528	28379	27896		30124	25781	26428		24023		21612		20243
chr23	87948	83451	81018		80066	73065	66938		77231	70218	65190		63610		54315		53851
chr24	98380	93617	90980		90058	82323	76075		88576	80171	74915		76039		58855		64831
chr25	34406	31951	31370		31160	27916	24821		26064	21740	21270		21082		18246		16909
chr26	81491	78256	75463		74462	69021	62589		72547	66214	61429		60559		47394		51758
chr27	87140	81607	84860		80145	73029	68485		73670	64740	63432		59390		57421		52448
chr28	70110	65793	64065		63282	56838	51996		58865	52263	49383		46669		44259		37556
chr32	2	8	17		2	8	15		2	0	0		2		1		0
chrW	3378	3843	3377		3270	3683	2660		486	161	310		419		389		312
chrZ	777277	661618	859324		701861	543493	708043		613871	454996	585752		453147		447122		265797
chrM	95	78	108		82	58	90		82	58	90		80		34		74
chrLGE22C19W28_E50C23	13264	12491	12175		11965	10815	9848		10885	9579	9113		9303		7327		8081
chrLGE64	29332	26638	26797		27546	25106	20652		17897	11059	12709		14385		13897		12965
SUM	14757670	13642483	13442923		13234036	11582878	10971799		12879713	11145661	10665711		10420560		9213780		8486838
SUM3,6,28	2297603	2125837	2055976		2054930	1799979	1673067		2021911	1759887	1652870		1652105		1448070		1356184
